# Supplementary material for: Oncogenic STRAP Supports Hepatocellular Carcinoma Growth by Enhancing Wnt/β-Catenin Signaling
Source: Oxford University Press journal article supplement (doi:10.1158/1541-7786.mcr-18-0054), 2018-09-26
Supplement: 15417786mcr180054-sup-195663_2_supp_5001011_pfbgnv.pdf [file 15417786mcr180054-sup-195663_2_supp_5001011_pfbgnv.pdf]

## STRAP staining

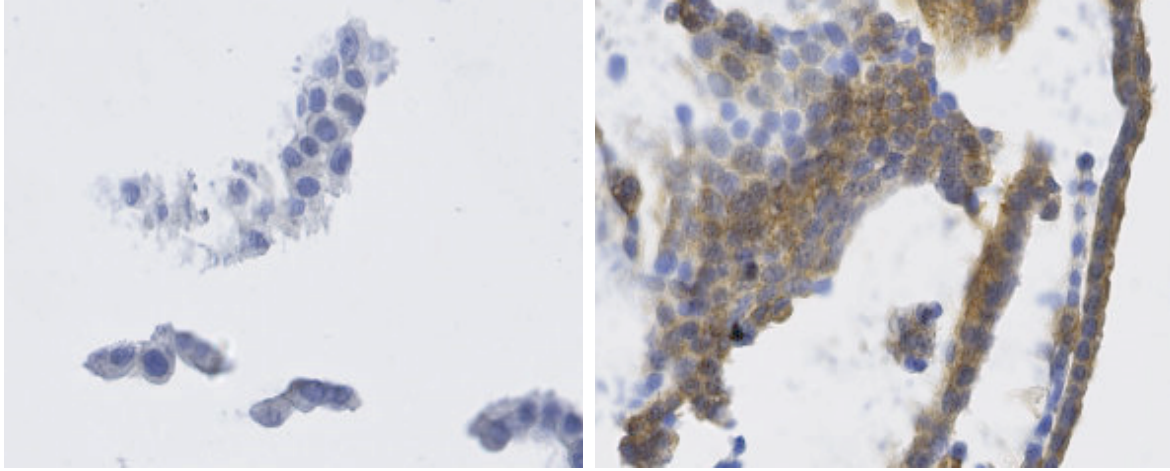

Knock-out

Control

Huh6

**Figure S1.** Specificity of STRAP antibody tested on a STRAP knock-out Huh6 clone and control thereof. For this purpose, both cell lines were formalin-fixed and embedded in paraffin.

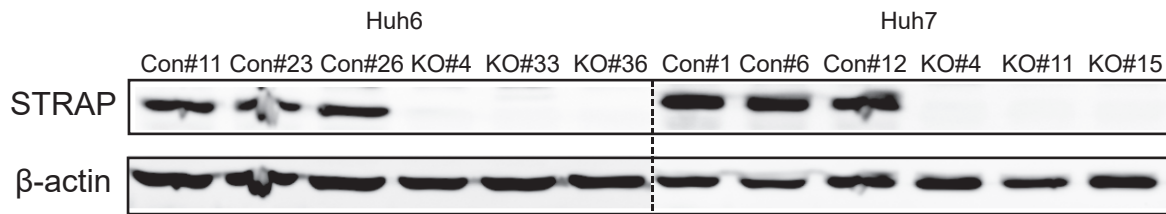

| Exons | Clones        | AA alteration | Size  | Sequences                                                                                                            |
|-------|---------------|---------------|-------|----------------------------------------------------------------------------------------------------------------------|
| 1     | Wild type     | -             | -     | CACGCGACCCGTGGTTGATTGGCCTTCAGTGGCATCACGCCTTATGGGTATTCTT<br>TAATCAGCTGGCCACACGCGACCCGTGGTTGAATT                       |
| 1     | Huh6<br>KO#33 | Insertion     | +81   | CACGCGACCCGTGGTTGA <b>CCCCGTCTCCCTGGCTTTAGCCACCTCTCCATCCTCTT<br/>GCTTTCCTTTGCCTGGACACCCCGTTCTCCTGTGGATTCGGGTA</b> TT |
| 2     | Wild type     | -             | -     | TGCAAACTGAATAAGGATGCCACCAAAGCAGCTACAG                                                                                |
| 2     | Huh6<br>KO#4  | Deletion      | -1    | TGCAAACTGA:TAAGGATGCCACCAAAGCAGCTACAG                                                                                |
|       |               | Insertion     | +1    | TGCAAACTGA <b>A</b> TAAGGATGCCACCAAAGCAGCTACAG                                                                       |
|       |               | Deletion      | -22   | TGCAACAC::::::::::::::::::::::::::::AGCTACAG                                                                         |
| 2     | Huh6<br>KO#36 | Insertion     | +2    | TGCAAACTGA <b>AA</b> TAAGGATGCCACCAAAGCAGCTACAG                                                                      |
|       |               | Insertion     | +1    | TGCAAACTGA <b>A</b> TAAGGATGCCACCAAAGCAGCTACAG                                                                       |
| 2     | Huh7 KO#4     | Insertion     | +1    | TGCAAACTGA <b>A</b> TAAGGATGCCACCAAAGCAGCTACAG                                                                       |
| 2     | Huh7<br>KO#11 | Insertion     | +1    | TGCAAACTGA <b>A</b> TAAGGATGCCACCAAAGCAGCTACAG                                                                       |
|       |               | Deletion      | -1    | TGCAAACTGA:TAAGGATGCCACCAAAGCAGCTACAG                                                                                |
|       |               | Insertion     | +~300 | from Ecoli and other unknown sources                                                                                 |
| 2     | Huh7<br>KO#15 | Insertion     | +1    | TGCAAACTGA <b>A</b> TAAGGATGCCACCAAAGCAGCTACAG                                                                       |
|       |               | Deletion      | -1    | TGCAAACTGA:TAAGGATGCCACCAAAGCAGCTACAG                                                                                |

**Figure S2.** Knockout of the STRAP gene by CRISPR/Cas9 technology in HCC cell lines. Huh6 and Huh7 were transfected with STRAP-targeting vectors and single-cell sorted by FACS. The surviving clones were subjected to western blot. Depicted are STRAP protein levels of independent control and knock-out clones selected for further analysis. The lower panel shows the sequence alterations of each STRAP knock-out clone. All control clones showed only the wild-type sequence. The insertion of 81 nucleotides in Huh6 KO#33 results in additional 27 amino acids within the WD40 region, which apparently makes the protein highly unstable as demonstrated by no detectable protein using two antibodies.

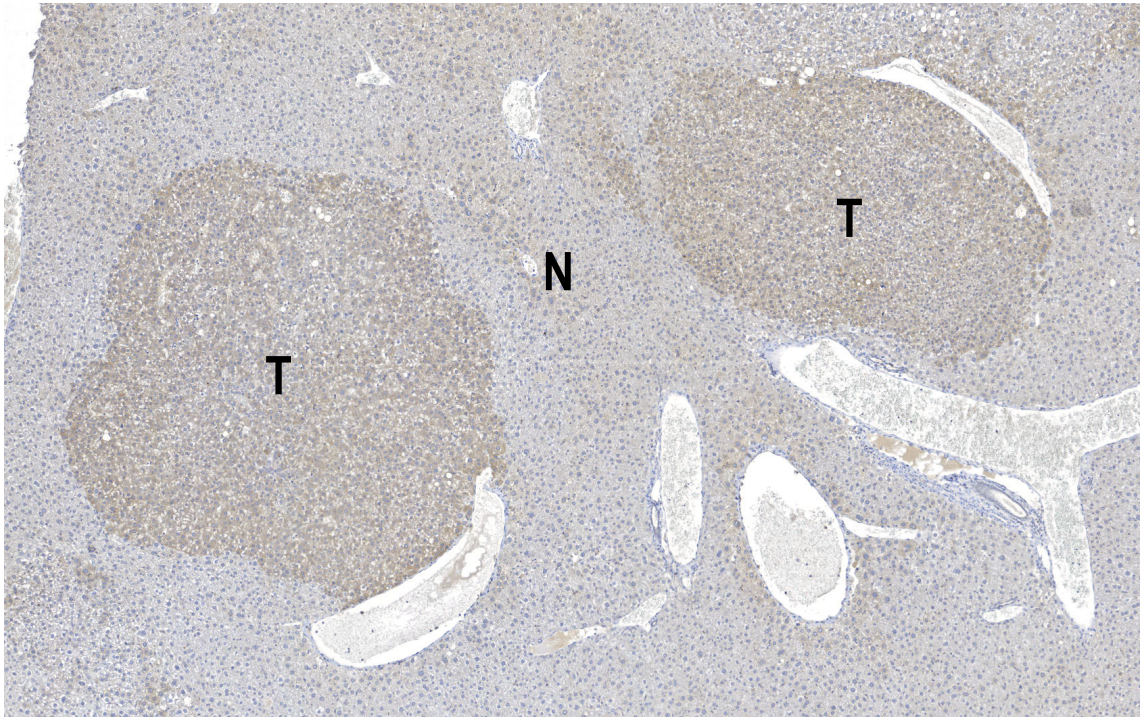

**Figure S3.** Elevated expression of STRAP in DEN-induced mouse liver tumors (T) compared with flanking normal liver tissue (N).

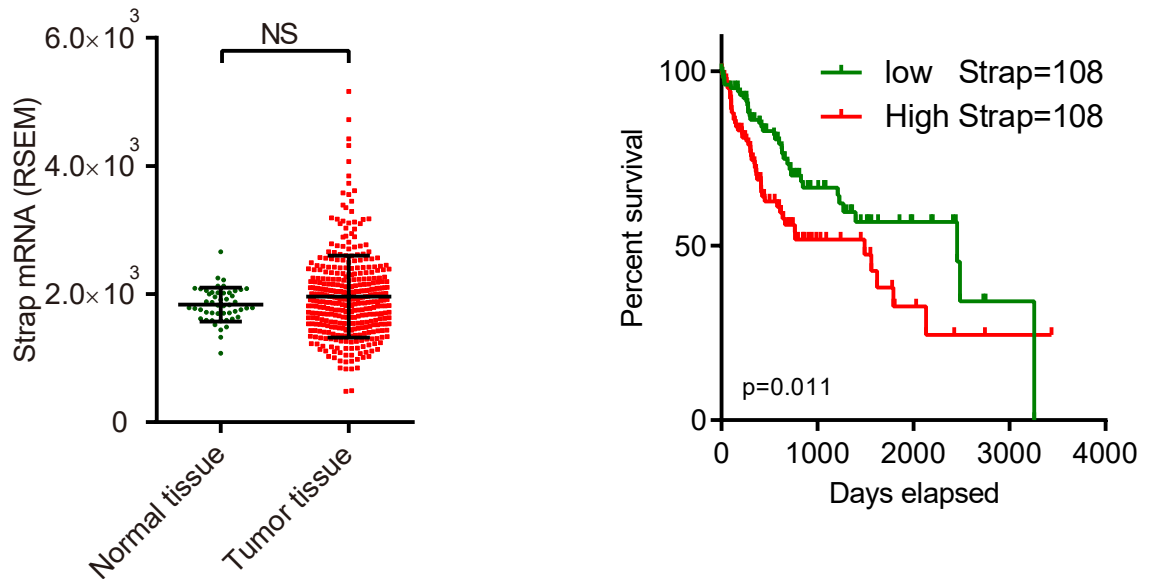

**Figure S4.** Analysis of the TCGA liver cancer cohort reveals that no significant difference in average *STRAP* RNA levels is observed between normal and tumor samples. Kaplan-Meier survival analysis and a log-rank test of the top and bottom 30% *STRAP* expressors revealed a significant trend ( $p=0.011$ ) of reduced survival in the high expressing group.



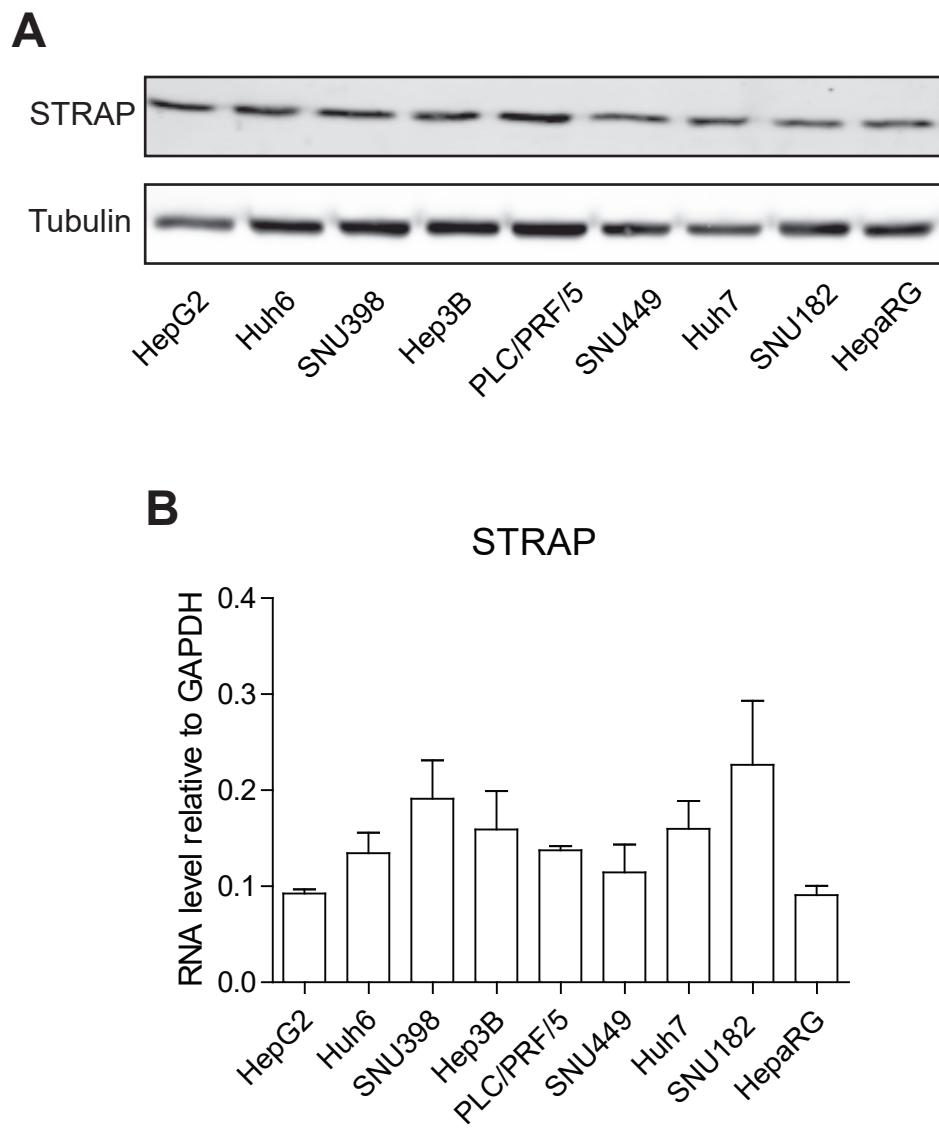

**Figure S5.** Baseline levels of STRAP protein and RNA in a panel of 9 HCC cell lines.

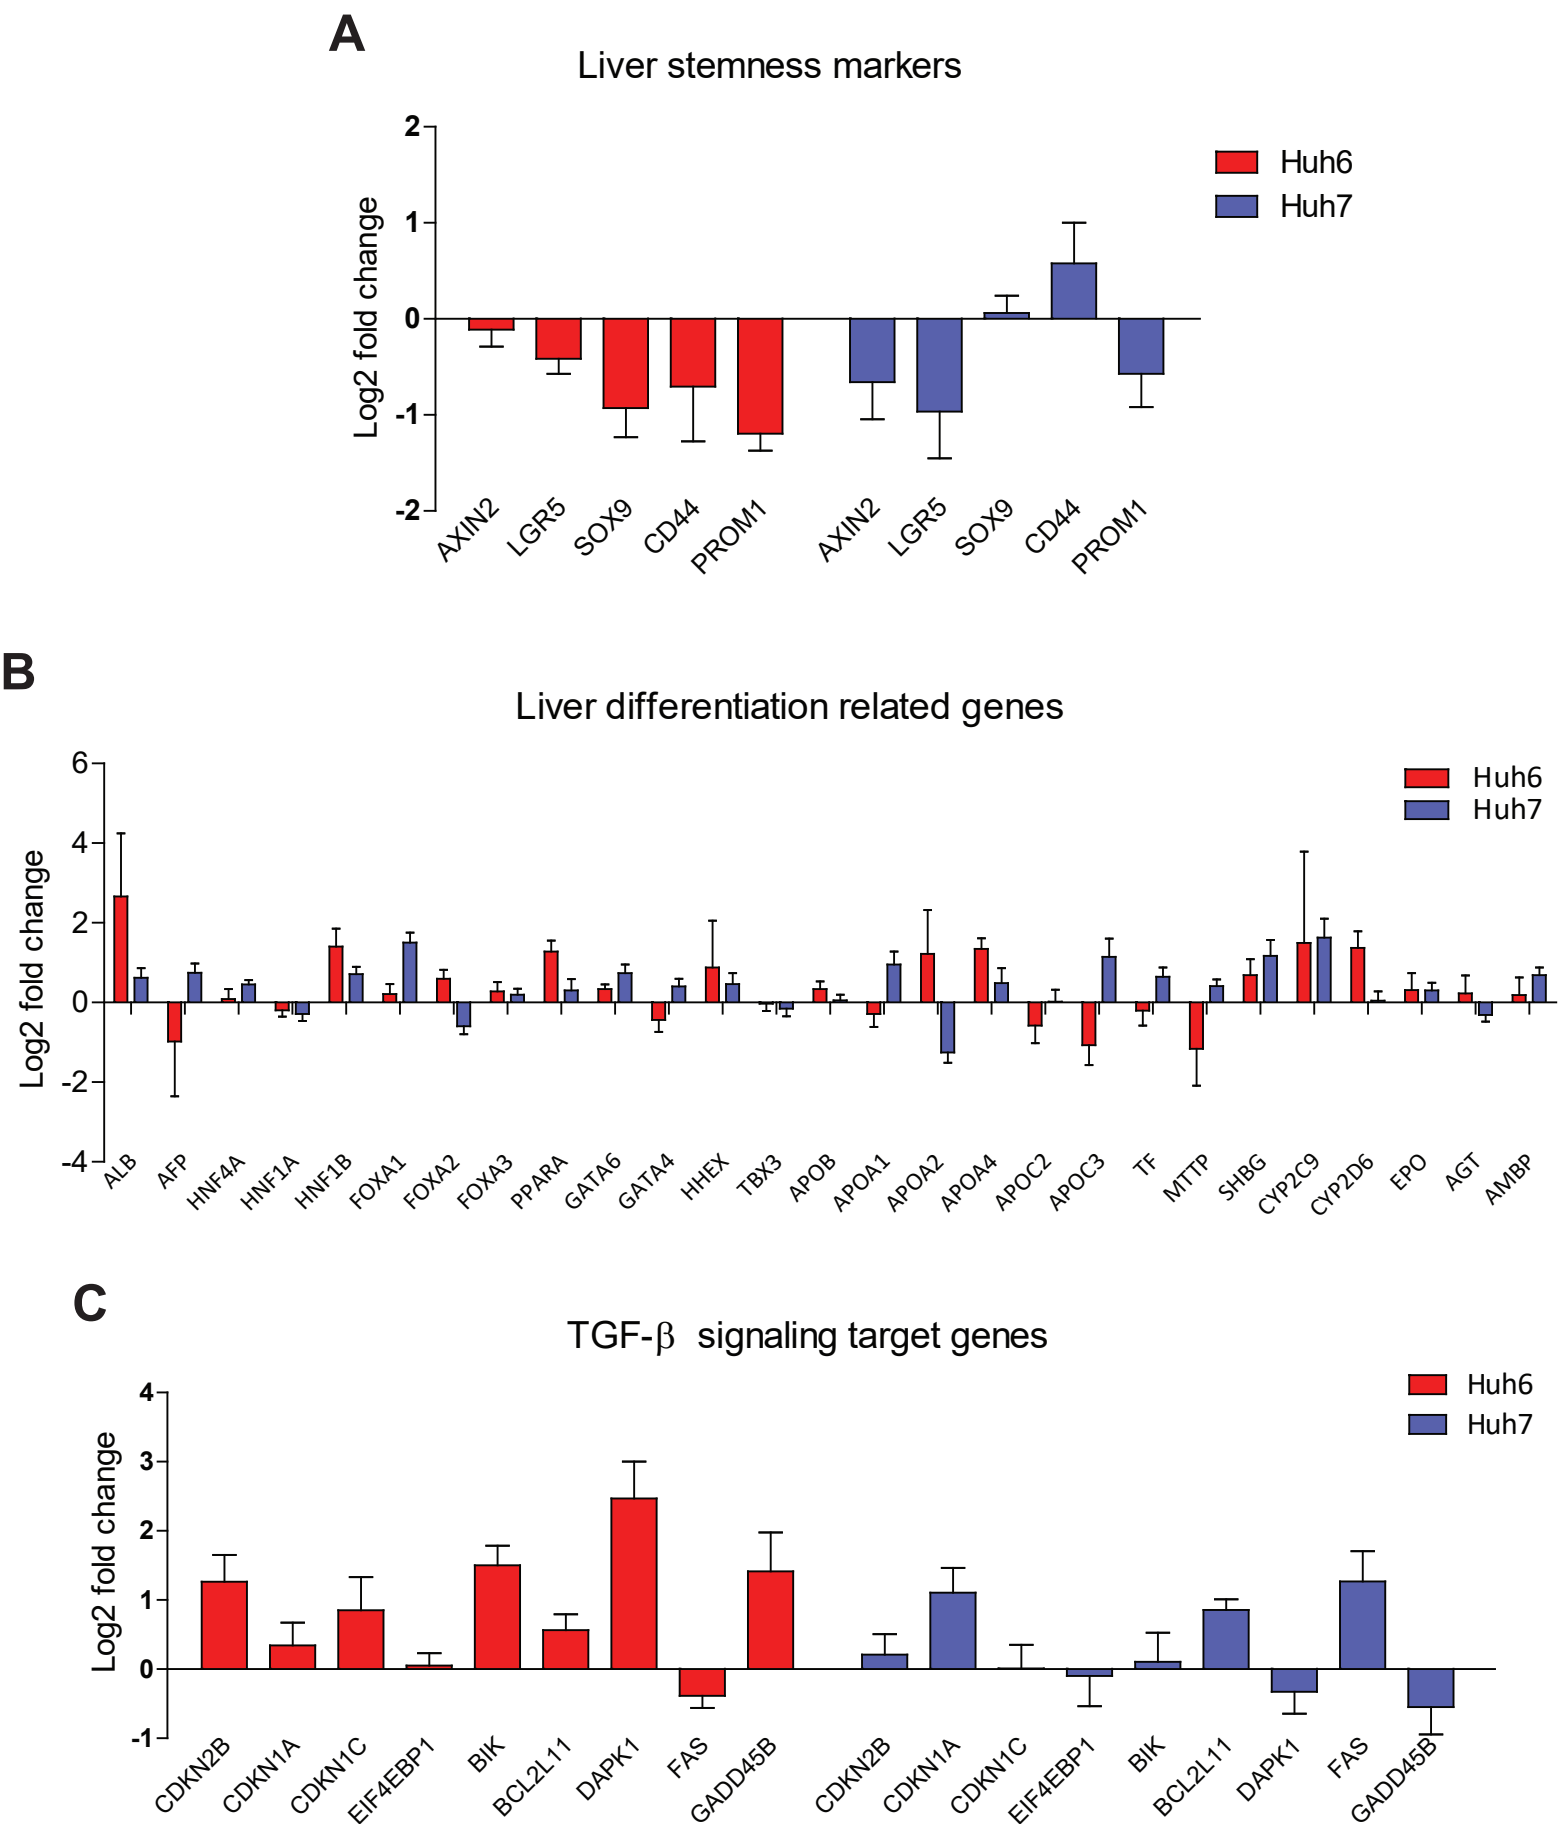

**Figure S6.** Log2 fold change of liver stemness markers (A), liver differentiation related genes (B) and TGF- $\beta$  signaling target genes (C) in STRAP knock-out clones compared to controls. The results are presented as log2 fold change  $\pm$  Standard Error, n=3.

Supplemental Table S1. Gene mutations of Wnt/ $\beta$ -catenin signaling components in HCC cell lines

| Cell line | Gene          | AA alteration     | Zygoty       |
|-----------|---------------|-------------------|--------------|
| HepG2     | <i>CTNNB1</i> | p.W25_I140 del    | Heterozygous |
| Huh6      | <i>CTNNB1</i> | p.G34V            | Heterozygous |
| SNU398    | <i>CTNNB1</i> | p.S37C            | Heterozygous |
| Hep3B     | <i>AXIN1</i>  | p.R146*           | Homozygous   |
| PLC/PRF/5 | <i>AXIN1</i>  | p.(R373_M418 del) | Homozygous   |
| SNU449    | <i>AXIN1</i>  | p.R712*           | Homozygous   |
| Huh7      |               |                   |              |
| HepaRG    |               |                   |              |
| SNU182    |               |                   |              |

Supplemental Table S2. Clinicopathologic characteristics of HCC TMA

| Characteristic                                         | N=109               |
|--------------------------------------------------------|---------------------|
| Age (median, range)                                    | 60.3 (23-87)        |
| Male/Female (n, %)                                     | 80/29 (73/27)       |
| Hepatitis-Ba/Hepatitis-Cb (n, %)                       | 20/17 (18/16)       |
| Cirrhosis (n, %)                                       | 59 (46)             |
| Tumor differentiation (n, %)<br>(well, moderate, poor) | 33/57/18 (31/53/17) |
| Vascular invasion (n, %)                               | 57 (61)             |
| Single vs multiple lesions (n, %)                      | 73/36 (67/33)       |
| Median size (median, range)                            | 4.5 cm (0.5-25.0)   |
| Median AFP (median, range)                             | 8.5 ug/l (1-63.000) |
| Recurrence (n, %)                                      | 41 (38)             |
| HCC related death (n, %)                               | 27 (25)             |

Supplemental Table S3. Selected *STRAP* sgRNAs

| Species | Gene target | gRNA   | Sequence             |
|---------|-------------|--------|----------------------|
| Human   | STRAP exon2 | sgRNA1 | TTGGGGTGCAACACTGAATA |
|         | STRAP exon1 | sgRNA2 | AATCAACCACGGGTCGCGTG |
|         | STRAP exon1 | sgRNA3 | CACGCGACCCGTGGTTGATT |

Supplemental Table S4. Primer sequences of *STRAP* used for Sanger sequencing

| Exons        | Forward Sequence (5'~3') | Reverse Sequence (5'~3') |
|--------------|--------------------------|--------------------------|
| <i>Exon1</i> | CCCTTCTTTTCCTGTTGCC      | GTGTTGGCTCTCATCTCAG      |
| <i>Exon2</i> | GGTGGTAGTTAAATAGCTG      | TGGGATCAAACATGCGTTC      |

Supplemental Table S5. Primer sequence used for Ion Torrent sequencing

| Gene         | Forward Sequence (5'~3')              | Reverse Sequence (5'~3')               |
|--------------|---------------------------------------|----------------------------------------|
| <i>STRAP</i> | Adapter A-Barcode-CCCTTCTTTTCCTGTTGCC | Adapter PI-Barcode-GTGTTGGCTCTCATCTCAG |

Supplemental Table S6. Primer sequences used for qRT-PCR

| Gene          | Forward Sequence (5'~3') | Reverse Sequence (5'~3') |
|---------------|--------------------------|--------------------------|
| <i>DCDC2</i>  | ACTTGGACATAGGAGAAATCAAGA | CGAGCTGACACGTTGATCCT     |
| <i>NTHL1</i>  | TATGAGGGCTCGGACAGTGA     | TTTGGTTTGGCTGGAGAGCA     |
| <i>RPS26</i>  | AAACATAGTGGAGGCCGCAG     | CACATACAGCTTGGGAAGCAC    |
| <i>OLR1</i>   | CCTTGCTCGGAAGCTGAATG     | TCTCCATGCCAGATCCAGTC     |
| <i>ABHD13</i> | CCGGCGACACCCGAG          | ACAAAGTTCCACAGCATCCAG    |
| <i>KLHL42</i> | GGCCTCCATGAACCAGAAGA     | GTTCCGGTCTCTGGTAGTGTAT   |
| <i>ZNF853</i> | AGCAGGAAATGCTCCACCAG     | GTGGAAGTCTGTTCTCTCTCC    |
| <i>LGR5</i>   | ACACGTACCCACAGAAGCTC     | CTAAAAGCCTGGACGGGGAT     |

Supplemental Table S7. Gene information

| Gene           | Protein                   |                                                                                                                                       |
|----------------|---------------------------|---------------------------------------------------------------------------------------------------------------------------------------|
| <i>STRAP</i>   | STRAP                     | A scaffolding protein without enzymatic function exerting regulatory functions on a variety of cellular processes                     |
| <i>CTNNB1</i>  | $\beta$ -catenin          | A dual function protein involved in regulation and coordination of cell–cell adhesion and gene transcription                          |
| <i>AXIN1</i>   | AXIN1                     | To form a destruction complex with APC, GSK3 and CK1 $\alpha$ leading to the degradation of $\beta$ -catenin                          |
| <i>AXIN2</i>   | AXIN2                     | To form a destruction complex with APC, GSK3 and CK1 $\alpha$ leading to the degradation of $\beta$ -catenin                          |
| <i>APC</i>     | APC                       | A tumor suppressor, negatively regulating $\beta$ -catenin by forming a destruction complex with AXIN1/2, GSK3 and CK1 $\alpha$       |
| <i>GSK3</i>    | GSK3                      | A Ser/Thr kinase                                                                                                                      |
| <i>CSNK1A1</i> | CK1 $\alpha$              | Kinase with preferential acidic protein targets                                                                                       |
| <i>LGR5</i>    | LGR5                      | The receptor of R-spondin family of stem cell factors to potentiate Wnt/ $\beta$ -catenin signaling                                   |
| <i>ASK1</i>    | MAP3K5                    | Mitogen-activated protein kinase                                                                                                      |
| <i>PI3K</i>    | PIK3CA                    | Phosphatidylinositol 3-kinase                                                                                                         |
| <i>PDK1</i>    | PDK1                      | Pyruvate dehydrogenase kinase                                                                                                         |
| <i>DCDC2</i>   | DCDC2                     | A protein with two doublecortin peptide domains binding to tubulin and enhancing microtubule polymerization                           |
| <i>NTHL1</i>   | NTHL1                     | A bifunctional DNA glycosylase that has an associated beta-elimination activity                                                       |
| <i>RPS26</i>   | 40S ribosomal protein S26 | A ribosomal protein as a component of the 40S subunit                                                                                 |
| <i>OLR1</i>    | OLR1                      | The protein binds, internalizes and degrades oxidized low-density lipoprotein                                                         |
| <i>ABHD13</i>  | ABHD13                    | Unknown                                                                                                                               |
| <i>KLHL42</i>  | KLHL42                    | Unknown                                                                                                                               |
| <i>ZNF853</i>  | Zinc finger protein 853   | A protein contains the zinc finger, a structural motif, for the coordination of one or more zinc ions in order to stabilize the fold. |
| <i>MYC</i>     | MYC                       | A multifunctional, nuclear phosphoprotein that plays a role in cell cycle progression, apoptosis and cellular transformation          |
| <i>CCND1</i>   | Cyclin D1                 | A member of highly conserved cyclin family, whose members are                                                                         |



|              |                          |                                                                                                                                                                  |
|--------------|--------------------------|------------------------------------------------------------------------------------------------------------------------------------------------------------------|
|              |                          | characterized by a dramatic periodicity in protein abundance throughout the cell cycle                                                                           |
| <i>GLUL</i>  | glutamate-ammonia ligase | It catalyzes the synthesis of glutamine from glutamate and ammonia in an ATP-dependent reaction                                                                  |
| <i>RGN</i>   | Regucalcin               | It may have an important role in calcium homeostasis                                                                                                             |
| <i>BIRC5</i> | BIRC5/ Survivin          | This protein functions to inhibit caspase activation, thereby leading to negative regulation of apoptosis or programmed cell death                               |
| <i>SOX9</i>  | SOX-9                    | A transcription factor                                                                                                                                           |
| <i>CD44</i>  | CD44                     | <i>CD44 participates in a wide variety of cellular functions including lymphocyte activation, recirculation and homing, hematopoiesis, and tumor metastasis.</i> |
| <i>PROM1</i> | Prominin-1/CD133         | The precise function of CD133 remains unknown, it has been proposed to act as an organizer of cell membrane topology                                             |
| <i>ALB</i>   | Albumin                  | Its main function is to regulate the Oncotic pressure of blood                                                                                                   |
| <i>AFP</i>   | alpha fetoprotein        | Alpha-fetoprotein expression in adults is often associated with hepatoma or teratoma                                                                             |
| <i>HNF4A</i> | HNF4A/ NR2A1             | HNF4A is a nuclear transcription factor                                                                                                                          |
| <i>HNF1A</i> | HNF1A                    | A transcription factor expressed in organs of endoderm origin                                                                                                    |
| <i>HNF1B</i> | HNF1B                    | <i>HNF1B is a nuclear transcription factor</i>                                                                                                                   |
| <i>FOXA1</i> | FOXA1/ HNF-3A            | A transcriptional activator for liver-specific transcripts such as albumin and transthyretin                                                                     |
| <i>FOXA2</i> | FOXA2/ HNF-3B/ TCF-3B    | A transcriptional activator for liver-specific transcripts such as albumin and transthyretin                                                                     |
| <i>FOXA3</i> | FOXA3/ HNF-3G/ TCF-3G    | A transcriptional activator for liver-specific transcripts such as albumin and transthyretin                                                                     |
| <i>PPARA</i> | PPARα/NR1C1              | A transcription factor and a major regulator of lipid metabolism in the liver                                                                                    |
| <i>GATA6</i> | GATA6                    | This protein preferentially binds (A/T/C)GAT(A/T)(A) of the consensus binding sequence.                                                                          |
| <i>GATA4</i> | GATA4                    | A member of the GATA family of zinc finger transcription factors                                                                                                 |
| <i>HHEX</i>  | HHEX                     | A member of the homeobox family of transcription factors, many of which are involved in the development of liver, thyroid, forebrain etc.                        |
| <i>TBX3</i>  | TBX3                     | A member of T-box family which are the transcription factors involved in the regulation of developmental processes                                               |
| <i>APOB</i>  | Apolipoprotein B         | Apolipoprotein B is the primary apolipoprotein of chylomicrons, VLDL, IDL, and LDL particles                                                                     |
| <i>APOA1</i> | Apolipoprotein A1        | Apolipoprotein A1 is the major protein component of high density lipoprotein particles in plasma.                                                                |

|                 |                                 |                                                                                                                                                           |
|-----------------|---------------------------------|-----------------------------------------------------------------------------------------------------------------------------------------------------------|
| <i>APOA2</i>    | Apolipoprotein A2               | The second most abundant protein of the high density lipoprotein particles                                                                                |
| <i>APOA4</i>    | Apolipoprotein A4               | Apolipoprotein A4 is secreted into circulation on the surface of newly synthesized chylomicron particles                                                  |
| <i>APOC2</i>    | Apolipoprotein C2               | A component of very low density lipoproteins and chylomicrons                                                                                             |
| <i>APOC3</i>    | Apolipoprotein C3               | A component of very low density lipoprotein                                                                                                               |
| <i>TF</i>       | Transferrin                     | Transferrins are iron-binding blood plasma glycoproteins that control the level of free iron (Fe) in biological fluids                                    |
| <i>MTTP</i>     | MTTP                            | This protein plays a central role in lipoprotein assembly                                                                                                 |
| <i>SHBG</i>     | SHBG/SSBG                       | A glycoprotein that binds to the two sex hormones: androgen and estrogen                                                                                  |
| <i>CYP2C9</i>   | CYP2C9                          | An important cytochrome P450 enzyme with a major role in the oxidation of both xenobiotic and endogenous compounds                                        |
| <i>CYP2D6</i>   | CYP2D6                          | A member of the cytochrome P450 mixed-function oxidase system, is one of the most important enzymes involved in the metabolism of xenobiotics in the body |
| <i>EPO</i>      | Erythropoietin/hematopoietin    | A hormone that induces red blood cell production                                                                                                          |
| <i>AGT</i>      | Angiotensinogen                 | Angiotensin is a peptide hormone that causes vasoconstriction and a subsequent increase in blood pressure                                                 |
| <i>AMBP</i>     | AMBP                            | AMBP interacts with CD79A                                                                                                                                 |
| <i>CDKN1A</i>   | p21 <sup>Cip1</sup>             | A cyclin-dependent kinase inhibitor (CKI) that is capable of inhibiting all cyclin/CDK complexes                                                          |
| <i>CDKN2B</i>   | CDKN2B                          | A cyclin-dependent kinase inhibitor                                                                                                                       |
| <i>CDKN1C</i>   | CDKN1C                          | A tight-binding inhibitor of several G1 cyclin/Cdk complexes and a negative regulator of cell proliferation                                               |
| <i>EIF4EBP1</i> | 4E-BP1                          | Interaction of this protein with eIF4E inhibits complex assembly and represses translation                                                                |
| <i>BIK</i>      | Bcl-2-interacting killer        | Interaction of this protein with cellular and viral survival-promoting proteins, such as BCL2 and the Epstein-Barr virus enhances programmed cell death   |
| <i>BCL2L11</i>  | BCL2L11                         | Interaction of this protein with other members of the BCL-2 protein family, including BCL2, BCL2L1/BCL-X(L), and MCL1, activates apoptosis                |
| <i>DAPK1</i>    | DAPK1                           | A positive mediator of gamma-interferon induced programmed cell death                                                                                     |
| <i>FAS</i>      | Fas cell surface death receptor | The Fas receptor is a death receptor on the surface of cells that leads to programmed cell death (apoptosis)                                              |

|                |         |                                                                                                                                                     |
|----------------|---------|-----------------------------------------------------------------------------------------------------------------------------------------------------|
| <i>GADD45B</i> | GADD45B | GADD45B responds to environmental stresses by mediating activation of the p38/JNK pathway and is involved in the regulation of growth and apoptosis |
|----------------|---------|-----------------------------------------------------------------------------------------------------------------------------------------------------|
